# Supplementary material for: Towards premium rapeseed oil: leveraging allelic variation in BnaFAD2.A5, BnaFAD3.A4 and BnaFAD3.C4 for molecular design breeding
Source: Research Square preprint supplement (doi:10.21203/rs.3.rs-8265460/v1), 2025-12-19
Supplement: Supplementary file 1 [file 598ec118ad553f528bf70b62.docx]

Table S1

Average performance of major quality traits for RG430A and RG430A-HOLL in field trials (2024-2025).

| Env. | Lines | Palmitic acid content (%) | Stearic acid content (%) | Oleic acid content (%) | Linoleic acid content (%) | Linolenic acid content (%) | Eicosanoic acid content (%) | cis-11-Eicosenoic acid content (%) | Oil content (%) |
| --- | --- | --- | --- | --- | --- | --- | --- | --- | --- |
| Jiangling | RG430A | 3.67±0.14a | 2.12±0.13a | 67.80±0.93b | 17.83±0.59a | 7.58±0.64a | 0.44±0.02a | 0.86±0.04a | 48.75±0.43a |
| RG430A-HOLL | 3.33±0.10b | 2.14±0.10a | 78.03±0.69a | 11.76±0.81b | 3.59±0.28b | 0.45±0.02a | 0.89±0.04a | 48.92±0.42a |

Notes: The values followed by the same letters are not significant different at α=0.05.

Table S2

Average performance of major agronomic traits for RG430A and RG430A-HOLL in field trials (2024-2025).

| Env. | Lines | Plant height (cm) | Silique length  (cm) | Number of seeds per silique | Thousand-seed weight  (g) |
| --- | --- | --- | --- | --- | --- |
| Jiangling | RG430A | 179.08±4.59a | 9.14±0.33a | 21.93±1.81a | 4.64±0.34a |
| RG430A-HOLL | 179.73±4.54a | 9.10±0.28a | 21.71±1.76a | 4.59±0.31a |

Notes: The values followed by the same letters are not significant different at α=0.05.
